# Supplementary material for: Preparative Method for Asymmetric Synthesis of (S)-2-Amino-4,4,4-trifluorobutanoic Acid
Source: MDPI journal article supplement (doi:10.3390/molecules24244521), 2019-12-10
Supplement: s1 [file s1]

## Supporting Information

### Preparative Method for Asymmetric Synthesis of (S)-2-Amino-4,4,4-trifluorobutanoic Acid Derivatives

Jianlin Han, Ryosuke Takeda, Xinyi Liu, Hiroyuki Konno, Hidenori Abe \*, Takahiro Hiramatsu, Hiroki Moriwaki \* and Vadim A. Soloshonok \*

|                                                                                         |    |
|-----------------------------------------------------------------------------------------|----|
| 1. General procedure.....                                                               | S2 |
| 2. HPLC analysis of alkylation reaction of (S)-6 with 1,1,1-trifluoro-2-iodoethane..... | S4 |
| 3. Purification and <sup>1</sup> H NMR of (S)-12.....                                   | S5 |
| 4. HPLC analyses of Fmoc-protection of (S)-12.....                                      | S6 |
| 5. Analytical data of (S)-12.....                                                       | S7 |
| 6. HPLC analysis conditions and spectra of 7 and 12.....                                | S8 |

## 1. General Procedure

### 1.1. Alkylation of (S)-6 with $\text{ICH}_2\text{CF}_3$

For large-scale preparation, the (S)-6 the procedure described in [1] was followed.

To a 5000 mL four-necked flask was added *N,N*-dimethyl-formamide (DMF) (2250 mL) under nitrogen atmosphere. Stirring was continued for 50 min with nitrogen flow. Then, the Ni-glycine complex (S)-6 (250.0 g, 1.0 equiv) together with DMF (100 mL), 1,1,1-trifluoro-2-iodoethane (91.61 g, 1.05 equiv) together with DMF (50 mL), and KOH (25.42 g, 1.05 equiv) in MeOH (225 mL) together with DMF (100 mL) were added to the flask. The mixture was stirred at 20–35 °C under a nitrogen atmosphere for 1 h. After that,  $\text{H}_2\text{O}$  (750 mL, 3 v) was added into the mixture and stirred for 1 h at 20–40 °C and precipitate was formed gradually. Then,  $\text{H}_2\text{O}$  (500 mL, 2 v) was added and stirred at the same temperature for 1 h. The precipitate was filtered and washed with  $\text{H}_2\text{O}$  (500 mL, 2 v), then dried by air for 19.5 h to give the product (S)(2S)-7 (228.50 g, 80.4% yield, 97.2 area%, >99% de).

### 1.2. Disassembly of Major Diastereomer (S)(2S)-7 and Preparation of (S)-12

To a 2000 mL four-necked flask was added dimethoxyethane (DME) (400 mL), Ni complex (S,2S)-7 (220 g, 1.0 equiv) together with DME (30 mL) and HCl (6N, 268 mL, 5.0 equiv) together with DME (10 mL). The mixture was heated to 40–50 °C and stirred at this temperature for 1 h. After that, the solution was changed to a green suspension and was cooled to 20–40 °C.  $\text{H}_2\text{O}$  (440 mL, 2 v) was added and the mixture was stirred at 20–40 °C for 1.5 h. The precipitate was filtered and washed with DME (88 mL, 0.4 v), 6N HCl (59 mL, 0.27 v),  $\text{H}_2\text{O}$  (293 mL, 1.33 v), then  $\text{H}_2\text{O}$  (220 mL, 1 v). The green filtrate was collected to give a solution of (S)-1 (ca. 1500 mL).

To a 3000 mL 4-necked flask containing the above green filtrate was added ethylenediaminetetraacetic acid disodium salt hydrate (122.2 g, 1.02 equiv). With stirring, 48% NaOH (138 g, 5.2 equiv),  $\text{Na}_2\text{CO}_3$  (1.3 equiv 44.35 g), Fmoc-OSu (1 equiv, 108.57 g), and acetonitrile (200 mL, 4 v) were added. The resulted mixture was stirred at room temperature for 4 h and acetonitrile was removed. Then, EtOAc (180 mL) and 6N HCl (70 mL, 4 eq.) were added and the phases were separated. The water layer was extracted with ethyl acetate (100 mL), and the combined organic layer was washed with water (100 mL). The combined organic solution was dried with  $\text{Na}_2\text{SO}_4$  (30 g), and then the filtrate was concentrated to 400 mL. The resulted solution was heated to 50–60 °C, and toluene (400 mL) was added. After that, it was concentrated until 400 mL, and EtOAc (100 mL) was added. Finally, toluene (400 mL) was added and then the solution was concentrated, followed by addition of additional toluene (400 mL) until 800 mL with stirring slowly at 20–35 °C. The precipitate was filtered, washed with toluene (160 mL), and dried in vacuo at 50 °C for 19 h to afford (S)-12 (99.5 g, 81.5% yield 98.4% ee, a white powder).

## 2. HPLC Analysis of Alkylation Reaction of (S)-6 with 1,1,1-Trifluoro-2-iodoethane

| Exp. #                             | Sample | RT/min, Peak Assign |          |         |       |       |                   |           |      |      |        | Comments              |
|------------------------------------|--------|---------------------|----------|---------|-------|-------|-------------------|-----------|------|------|--------|-----------------------|
|                                    |        | 15.6                | 16.8     | 17.5    | 18.0  | 19.3  | 20.1              | 20.7      | 21.5 | 25.9 | 27.2   |                       |
|                                    |        | QNZ                 | Oxidized | Hydroxy | CBPBG | Major | Minor             | bis-alkyl | uk   | uk   | Ligand |                       |
| 1391-065<br>for 30 g               | 10 min | 0.26                | 0.29     | 1.41    | 1.01  | 78.43 | 1.89              | 3.54      | 0.36 | 0.47 | 2.72   | 95.3% de <sup>b</sup> |
|                                    | 1 h    | 0.28                | 0.33     | 0.52    | 0.74  | 86.38 | 2.08              | 6.04      | 0.38 | 0.40 | 1.06   | 95.3% de              |
|                                    | solid  | n.d.                | 0.21     | n.d.    | 0.18  | 97.66 | n.d. <sup>a</sup> | 1.22      | 0.39 | 0.10 | 0.20   | >99% de               |
|                                    | ML     | 5.97                | 1.54     | 2.49    | 3.79  | 15.17 | 0.86              | 28.49     | n.d. | 1.62 | 20.03  | -                     |
| 1391-069<br>1st batch<br>for 170 g | 15 min | 0.27                | 0.72     | 1.67    | 0.82  | 79.32 | 1.94              | 4.23      | 0.32 | 0.35 | 1.52   | 95.2% de              |
|                                    | 1 h    | n.d.                | 0.35     | 1.12    | 1.16  | 86.42 | 2.20              | 5.87      | 0.43 | 0.33 | 0.85   | 95.0% de              |
|                                    | solid  | n.d.                | 0.20     | 0.25    | 0.31  | 97.13 | 0.02              | 1.20      | 0.44 | 0.08 | 0.19   | 99.9% de              |
|                                    | ML     | n.d.                | 1.80     | 3.99    | 8.60  | 20.30 | 1.26              | 31.83     | n.d. | 1.34 | 20.14  | -                     |
| 1391-070<br>2nd batch<br>for 170 g | 15 min | n.d.                | 1.23     | 0.24    | 0.73  | 85.44 | 1.07              | 4.16      | 0.32 | 0.38 | 1.71   | 97.5% de              |
|                                    | 1 h    | n.d.                | 0.33     | 0.23    | 1.17  | 87.75 | 1.15              | 5.50      | 0.34 | 0.29 | 1.05   | 97.4% de              |
|                                    | solid  | n.d.                | 0.18     | n.d.    | 0.41  | 97.16 | n.d.              | 1.22      | n.d. | n.d. | 0.41   | >99% de               |
|                                    | ML     | n.d.                | 1.72     | 0.75    | 10.93 | 18.05 | 1.32              | 29.31     | n.d. | 1.16 | 25.66  | -                     |

<sup>a</sup> n.d. = not detected. <sup>b</sup> de = diastereomeric excess

**Exp. # 1391-068 Purification of (S)-12.**

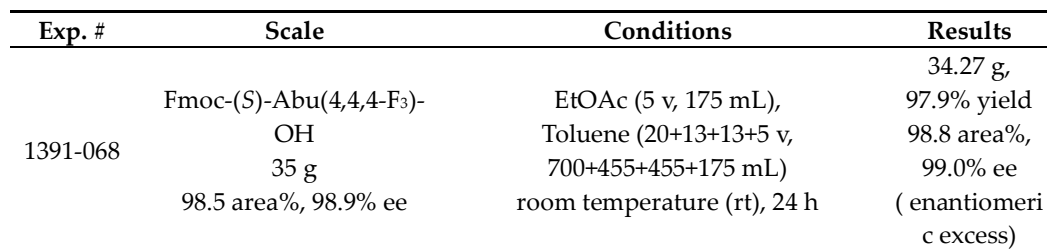[illegible]

#### 4. HPLC Analyses of Fmoc-Protection of (S)-12

| Exp. #   | Sample    | RT/min, Peak Assign |                    |      |          |                                |      |           |      |        | Comments  |
|----------|-----------|---------------------|--------------------|------|----------|--------------------------------|------|-----------|------|--------|-----------|
|          |           | 15.3                | 15.4               | 16.0 | 16.8     | 17.7                           | 19.0 | 19.8      | 21.0 | 27.2   |           |
|          |           | Fmoc-Gly            | Fmoc- $\beta$ -Ala | uk   | Fmoc-OSu | Fmoc-AA<br>Fmoc-OSu<br>Toluene | uk   | bis-alkyl | DBF  | Ligand |           |
| 1391-067 | crude     | n.d.                | 0.43               | 0.02 | n.d.     | 98.53                          | 0.40 | 0.07      | 0.02 | 0.15   | 98.9% ee  |
| 1391-068 | purified  | n.d.                | 0.23               | n.d. | n.d.     | 98.80                          | n.d. | n.d.      | n.d. | 0.07   | 99.0% ee  |
| 1391-075 | 1st batch | 0.29                | 0.22               | n.d. | 0.07     | 98.72                          | 0.23 | 0.09      | 0.11 | 0.02   | 98.8% ee  |
| 1391-077 | 2nd batch | 0.39                | 0.14               | n.d. | 0.13     | 97.89                          | 0.67 | 0.15      | 0.09 | 0.05   | 98.4% ee  |
| 1391-078 | purified  | 0.34                | 0.14               | n.d. | 0.03     | 99.32                          | 0.05 | n.d.      | 0.03 | 0.07   | 99.1% ee  |
|          | recover y | 0.47                | 0.60               | n.d. | 0.46     | 96.17                          | 1.22 | 0.26      | 0.40 | 0.09   | >99.9% ee |
|          | reprocess | 0.49                | 0.57               | n.d. | 0.42     | 97.03                          | 0.26 | n.d.      | 0.37 | 0.37   | 100% ee   |

## 5. Analytical Data of (S)-12

|                   | 30 g Synthesis    |                   | 170 g Synthesis              |                              |                                   |                     |                    |
|-------------------|-------------------|-------------------|------------------------------|------------------------------|-----------------------------------|---------------------|--------------------|
|                   | Fmoc-Protection   | Purification      | Fmoc-Protection<br>1st batch | Fmoc-Protection<br>2nd batch | Purification<br>Combined<br>Batch | Recovery<br>from ML | Reprocess          |
| Lot #             | 1391-06755        | 1391-06835        | 1391-07554                   | 1391-07754                   | 1391-07835                        | 1391-07840          | 1391-07854         |
| amount            | 35.32 g           | 34.27 g           | 92.66 g                      | 99.50 g                      | 163.20 g                          | 17.13 g             | 16.25 g            |
| yield             | (87.2%)           | 97.9%             | (75.9%)                      | (81.5%)                      | 85.5%                             | 9.0%                | 8.5%<br>(95.6%)    |
| HPLC<br>purity    | 98.53 area%       | 98.80 area%       | 98.7 area%                   | 97.9 area%                   | 99.32 area%                       | 96.16<br>area%      | 97.03 area%        |
| optical<br>purity | 98.9% ee          | 99.0% ee          | 98.8% ee                     | 98.4% ee                     | 99.1% ee                          | >99.9% ee           | 100% ee            |
| impurity          | Fmoc-Gly:<br>n.d. | Fmoc-Gly:<br>n.d. | Fmoc-Gly:<br>n.d.            | Fmoc-Gly:<br>n.d.            | Fmoc-Gly:<br>0.34%                | Fmoc-Gly:<br>0.48%  | Fmoc-Gly:<br>0.49% |
|                   | Fmoc-β-Ala: 0.43% | Fmoc-β-Ala: 0.23% | Fmoc-β-Ala: 0.43%            | Fmoc-β-Ala: 0.43%            | Fmoc-β-Ala: 0.14%                 | Fmoc-β-Ala: 0.58%   | Fmoc-β-Ala: 0.57%  |
|                   | 19.0 min: 0.40%   | 19.0 min: n.d.    | 19.0 min: 0.40%              | 19.0 min: 0.40%              | 19.0 min: 0.05%                   | 19.0 min: 1.22%     | 19.0 min: 0.26%    |
|                   | (20.3 min: 0.05%) | (20.3 min: 0.50%) | (20.3 min: 0.05%)            | (20.3 min: 0.05%)            | (20.3 min: n.d.)                  | (20.3 min: n.d.)    | (20.3 min: n.d.)   |
|                   |                   |                   |                              |                              |                                   |                     |                    |

## 6. HPLC Analysis Conditions and Spectra of 7 and 12

### 6.1. HPLC Conditions (achiral)

Column: Inertsil ODS-3, S-3  $\mu\text{m}$ ,  $\phi 4.6 \times 150$  mm  
Solvent A: 0.01 M  $\text{HCOONH}_4$  in 0.1%  $\text{HCOOH}$  aq  
Solvent B: acetonitrile  
Flow rate: 1.0 mL/min; column temperature: 30  $^\circ\text{C}$   
UV: 254 nm

| Time(min)     | 0.0 | 15.00 | 20.00 | 23.00 | 30.00 | 30.01 | 37.00 |
|---------------|-----|-------|-------|-------|-------|-------|-------|
| Solvent A (%) | 95  | 20    | 20    | 0     | 0     | 95    | 95    |
| Solvent B (%) | 5   | 80    | 80    | 100   | 100   | 5     | 5     |

### 6.2. Chiral HPLC Conditions for (S)-**12** (200 min Method)

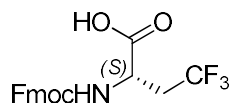

Molecular Weight: 379.3298

Fmoc-(S)-Abu(4,4,4-F<sub>3</sub>)

Column: CHIRALPAK IC (DAICEL CHEMICAL), S-5  $\mu\text{m}$ ,  $\phi 4.6 \times 150$  mm  
Solvent A: 0.1%  $\text{H}_3\text{PO}_4$  in  $\text{H}_2\text{O}$   
Solvent B: 0.1%  $\text{H}_3\text{PO}_4$  in acetonitrile  
Flow rate: 0.6 mL/min.  
Column temperature: 20  $^\circ\text{C}$   
UV: 254 nm  
Gradient: Isocratic (A:B = 72:28), 200 min

### 6.3. Chiral HPLC Chart of (S)-**12** (98.4% ee, Lot # 1391-07754)

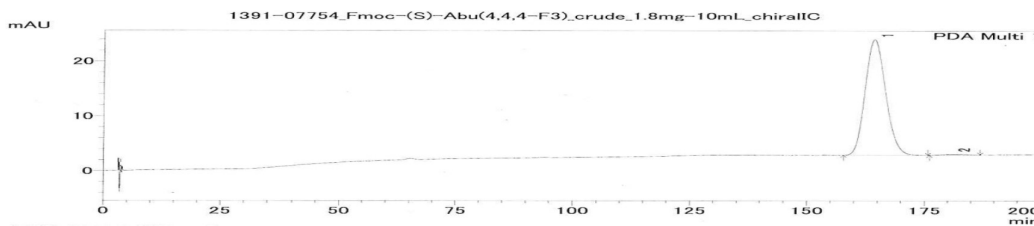

### 6.4. Chiral HPLC Chart of (S)-**12** (99.1% ee, Lot # 1391-07835)

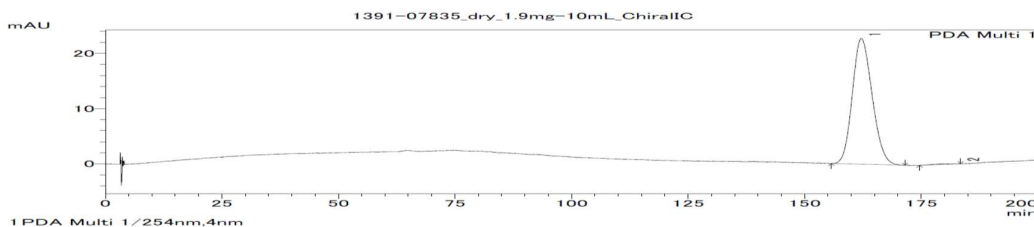

6.5. Chiral HPLC Chart of **12** ((S)- and (R)- Mixture)

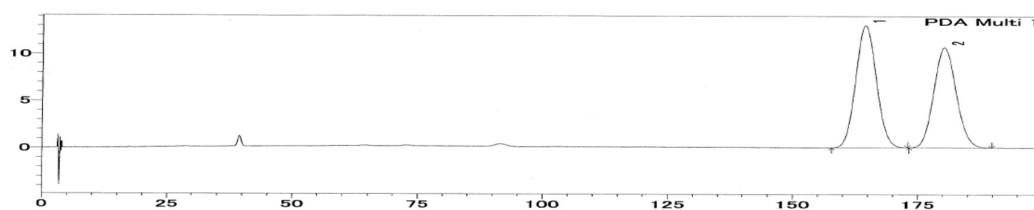



### 6.6. Chiral HPLC Analysis of (S,S)-7

The CHIRALPAK IA-e column was used for the analysis of optical purity.

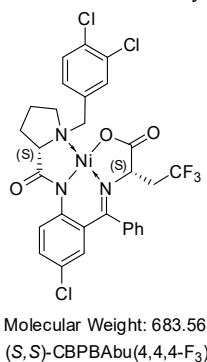

#### 6.6.1. Chiral HPLC Conditions for (S,S)-7

Column: CHIRALPAK IA-3 (DAICEL CHEMICAL), S-3  $\mu\text{m}$ ,  $\phi$  4.6  $\times$  250 mm

Solvent A: MeOH

Solvent B: H<sub>2</sub>O

Gradient: A:B = 90:10, 30 min (isocratic)

Flow rate: 0.5 mL/min.

Column temperature: 40  $^{\circ}\text{C}$

UV: 254 nm

#### 6.6.2. Chiral HPLC Chart of CBPBAbu(4,4,4-F<sub>3</sub>) ((S,S)- and (R,R)- mixture)

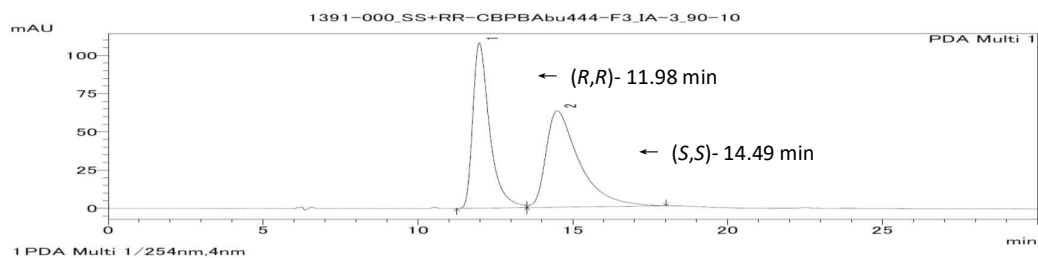

#### 6.6.3. Chiral HPLC Chart of (S,S)-CBPBAbu(4,4,4-F<sub>3</sub>) (100% ee, Lot # 1391-07039, 2.1 mg)

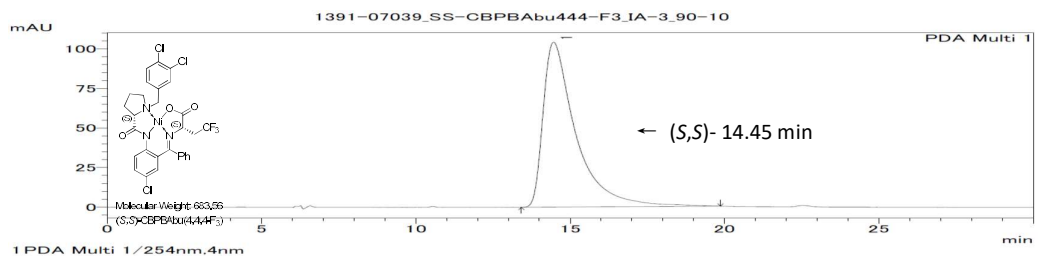

6.6.4. Chiral HPLC Chart of (R,R)-CBPBAbu(4,4,4-F<sub>3</sub>) (99.8% ee, Lot # 1423-05615, 2.4 mg)

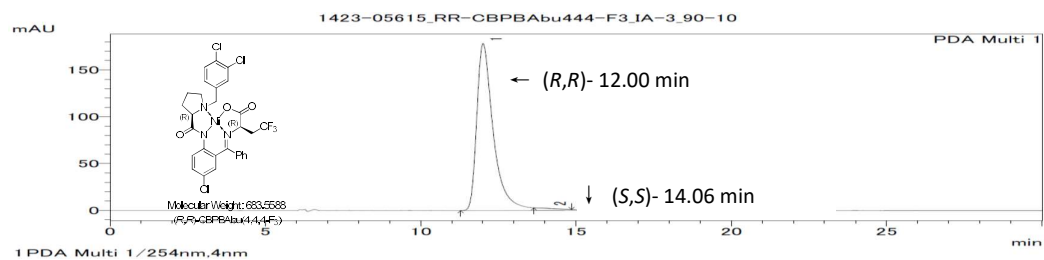

## References

1. Ueki, H.; Ellis, T.K.; Martin, C.H.; Bolene, S.B.; Boettiger, T.U.; Soloshonok, V.A. Improved Synthesis of Proline Derived Ni(II)-Complexes of Glycine, a Versatile Chiral Equivalents of Nucleophilic Glycine for General Asymmetric Synthesis of  $\alpha$ -Amino Acids, *J. Org. Chem.* **2003**, 68, 7104–7107.
